# Supplementary material for: Bradykinin B2 receptor blockade and intradialytic hypotension
Source: Springer Nature journal article supplement (doi:10.1186/s12882-023-03192-4), 2023-05-11
Supplement: MOESM1 [file 12882_2023_3192_MOESM1_ESM.pdf]

## Supplementary Figure 1.

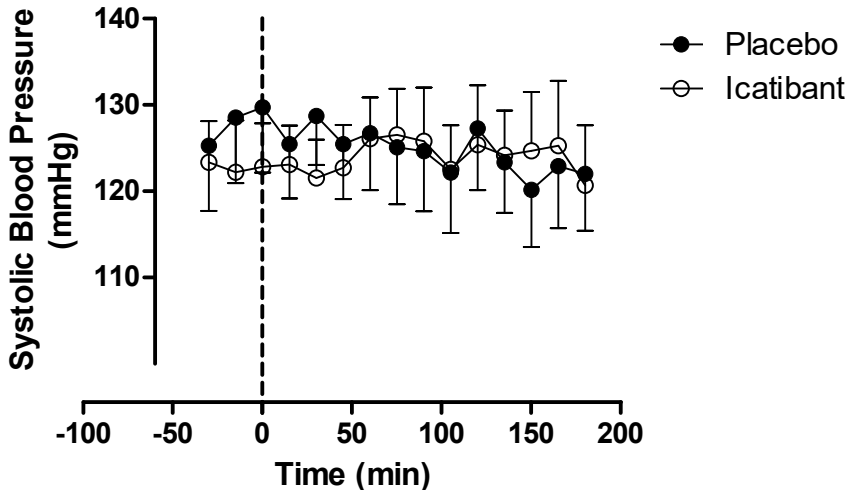

Effect of icatibant on systolic blood pressure during hemodialysis in all the evaluated patients (n=11).

## Supplementary Figure 2

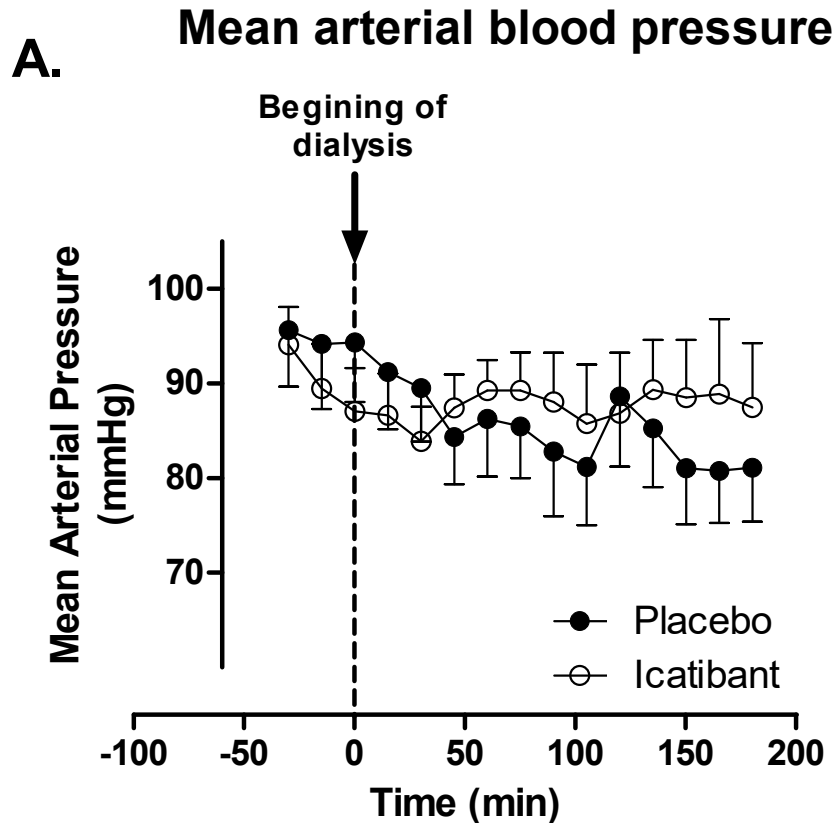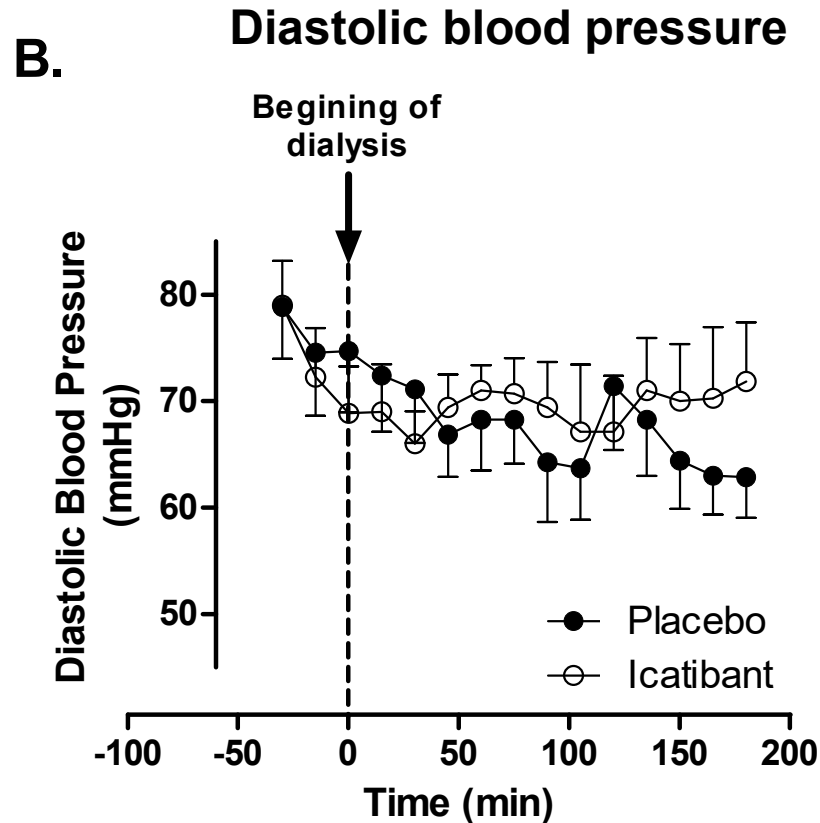

Effect of icatibant on mean arterial blood pressure (**A**) and diastolic blood pressure (**B**) during hemodialysis in patients with a reduction of blood pressure  $\geq 20$  mmHg (n=7).
